# Supplementary material for: CNOT3-Dependent mRNA Deadenylation Safeguards the Pluripotent State
Source: PubMed Central journal article supplement — Stem Cell Reports. 2016 Oct 13;7(5):897–910. doi: 10.1016/j.stemcr.2016.09.007 (PMC5106518; doi:10.1016/j.stemcr.2016.09.007), 2016-10-13
Supplement: mmc1.pdf [file mmc1.pdf]

**Stem Cell Reports, Volume 7**

**Supplemental Information**

**CNOT3-Dependent mRNA Deadenylation Safeguards the Pluripotent State**

**Xiaofeng Zheng, Pengyi Yang, Brad Lackford, Brian D. Bennett, Li Wang, Hui Li, Yu Wang, Yiliang Miao, Julie F. Foley, David C. Fargo, Ying Jin, Carmen J. Williams, Raja Jothi, and Guang Hu**

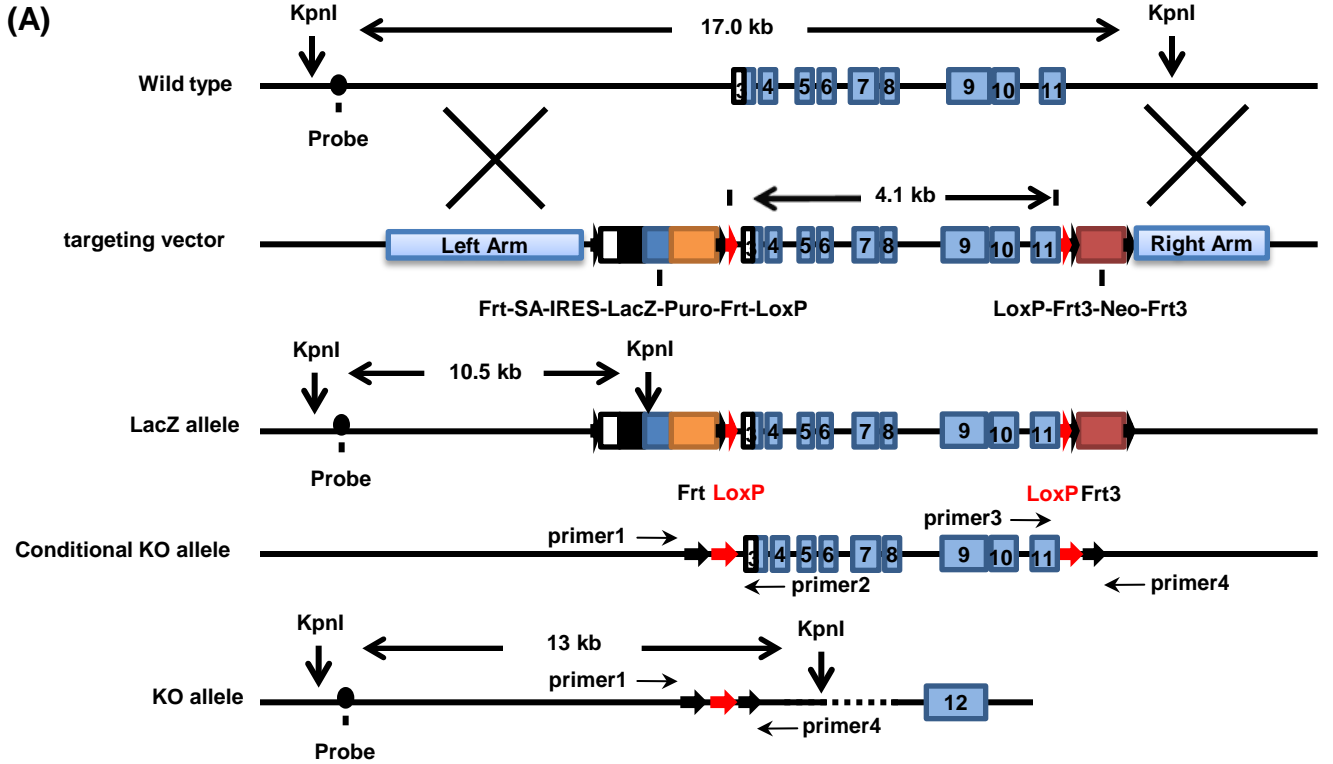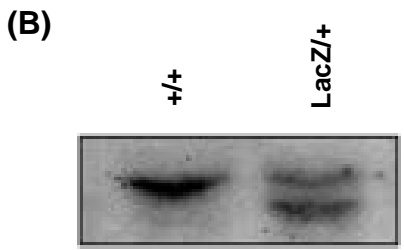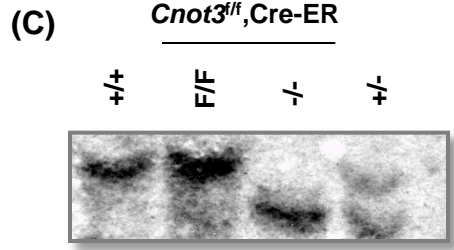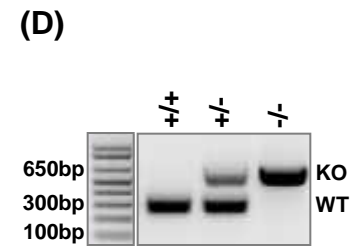

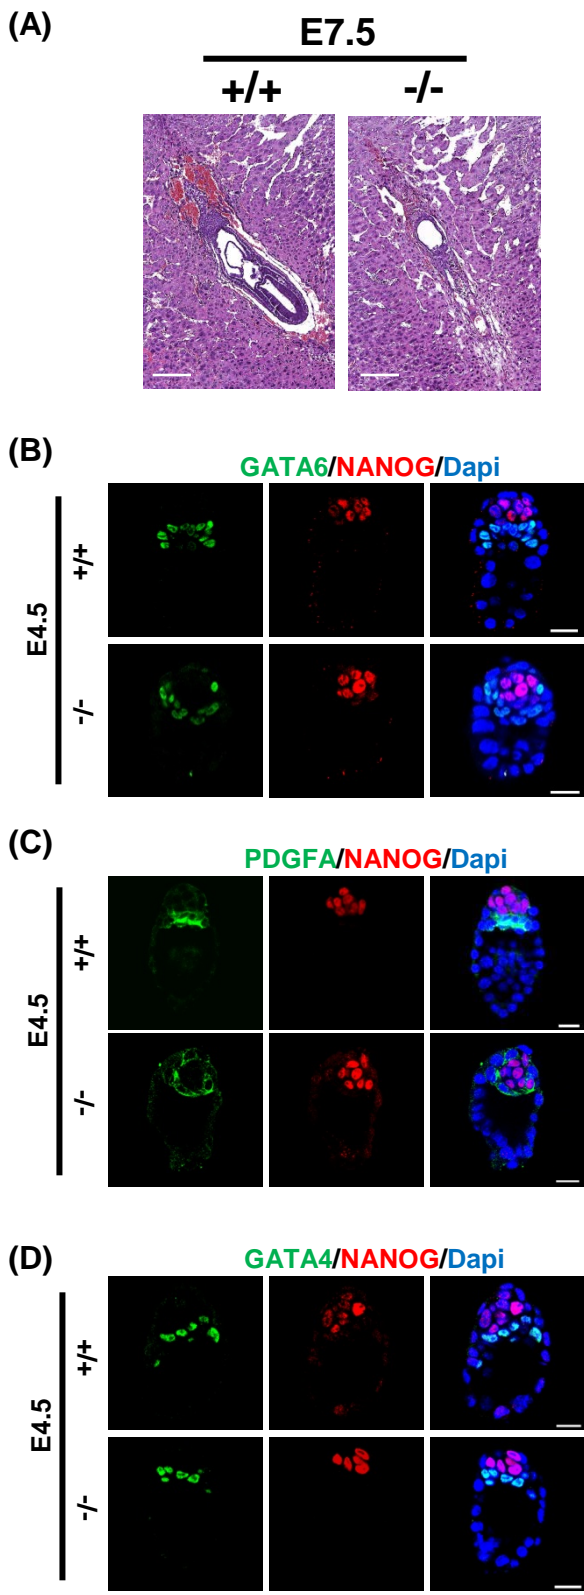

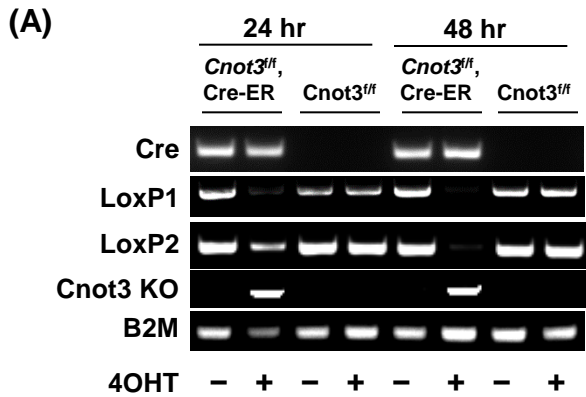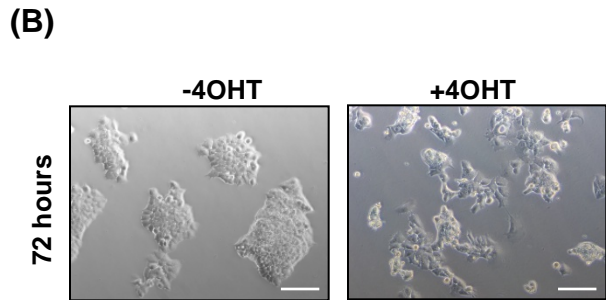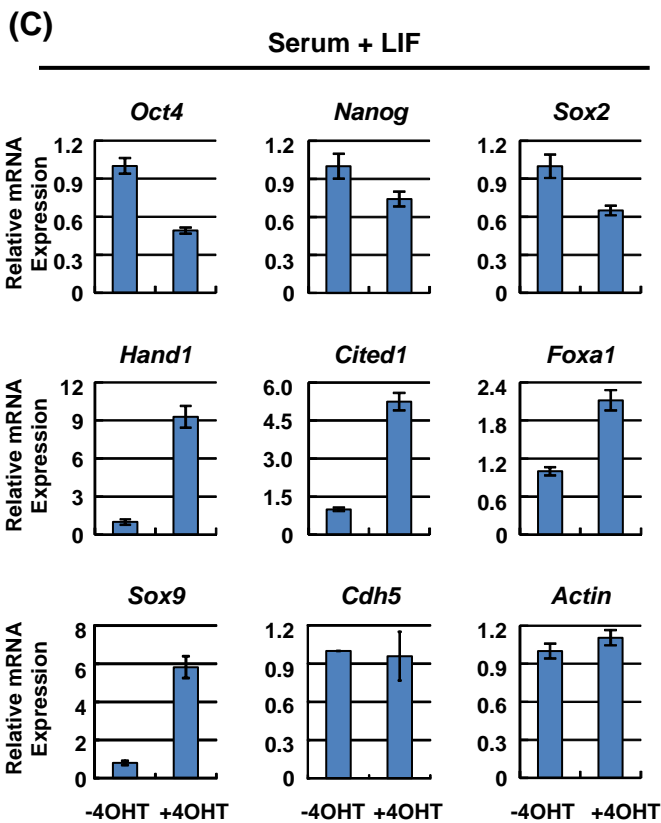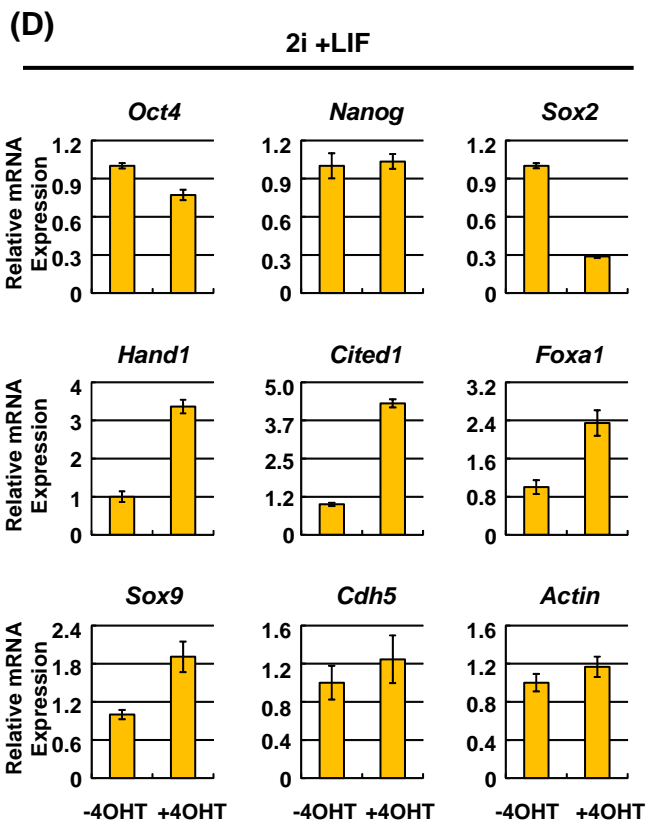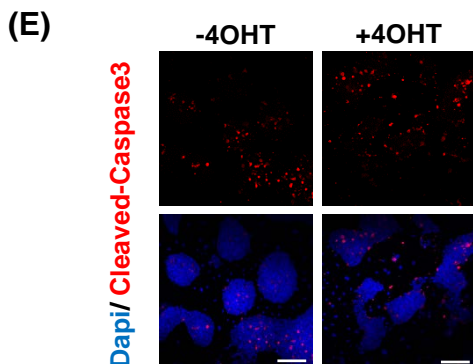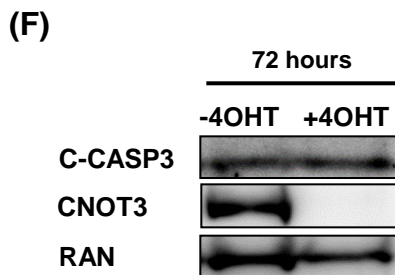

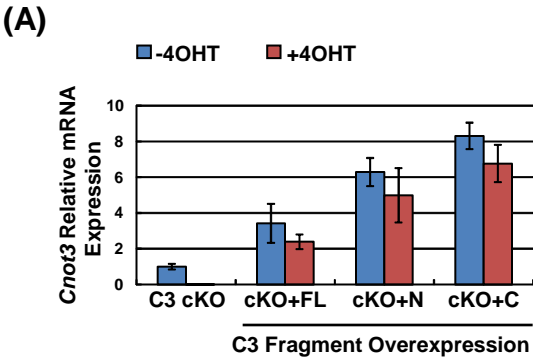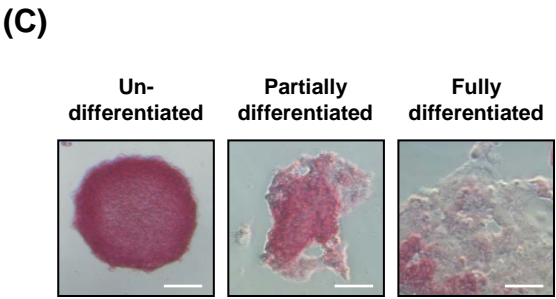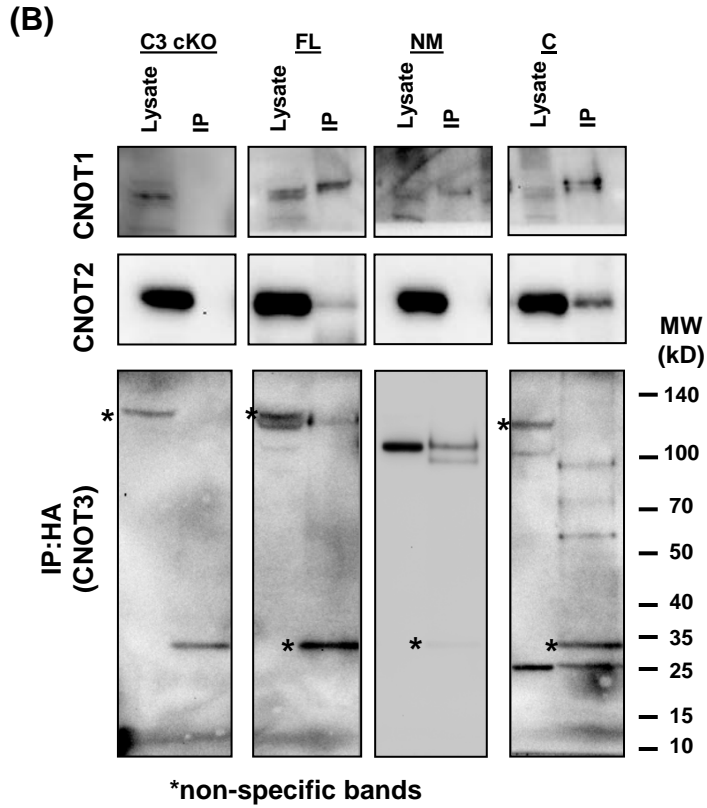

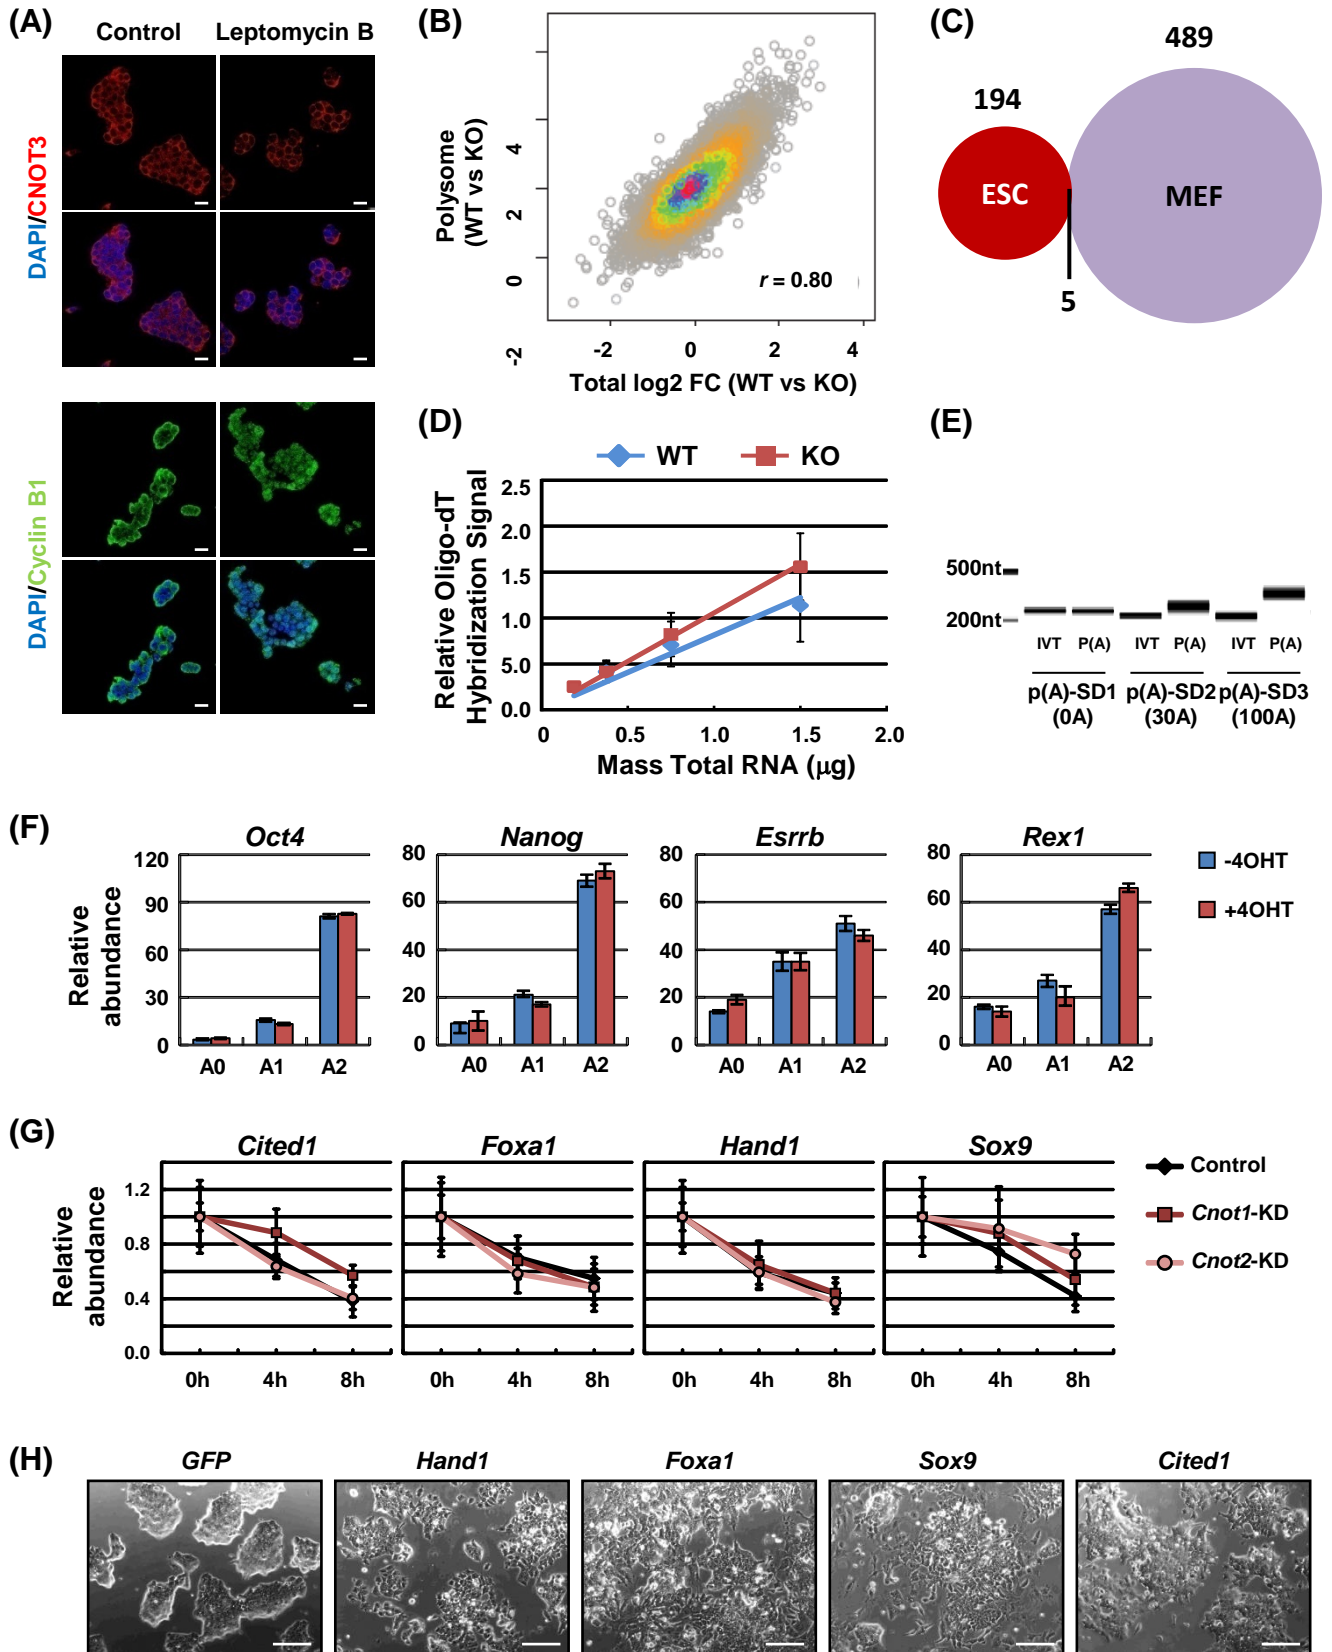

## Supplemental Figure Legends

**Figure S1. *Cnot3* gene deletion strategy.** (A) Gene targeting strategy for *Cnot3*. (B-D) Genotyping of *Cnot3* cKO mice (B) and ESCs (C) by Southern blotting, and *Cnot3* deletion embryos by genomic PCR (D).

**Figure S2. *Cnot3* deletion does not impact trophectoderm and primitive endoderm formation.** (A) Hematoxylin and eosin stain of E7.5 WT and *Cnot3* KO embryo sagittal sections (white bar = 200  $\mu$ m). Genotypes of the embryos were determined by laser capture microdissection. (B-C) Immunofluorescence staining of primitive endoderm markers GATA6, PDGFR $\alpha$ , GATA4 and epiblast marker NANOG in E4.5 WT and *Cnot3* deletion embryos (white bar = 20  $\mu$ m).

**Figure S3. *Cnot3* is required for ESC maintenance.** (A) Genotyping by genomic PCR in *Cnot3* cKO ESCs treated with (KO) or without (WT) 0.1  $\mu$ M 4-OHT for 24 and 48 hours. B2M primers amplify a genomic regions present in both WT and KO cells and serves as a control for PCR. (B) Morphological changes of *Cnot3* cKO ESCs 72 hours after 4-OHT treatment (white bar = 200  $\mu$ m). (C-D) Changes in marker gene expression 72 hrs after 4-OHT treatment in the serum+LIF medium (C) or the 2i+LIF medium (D), as determined by RT-qPCR. Expression was normalized by *Actin*, and values were plotted as Mean  $\pm$  SEM from 3 independent experiments. (E) Immunofluorescence staining (white bar = 10  $\mu$ m) and western blot (F) of cleaved-Caspase3 in WT and KO ESCs.

**Figure S4. C-terminal domain in CNOT3 is required for ESC maintenance.** (A) Overexpression of CNOT3 fragments in *Cnot3* cKO ESCs. Cells were treated with or without 4-OHT for 48 hrs, and the expression of total *Cnot3* (endogenous *Cnot3* and exogenous *Cnot3* fragment) was determined by RT-qPCRs. Expression was normalized by *Actin*, and values were plotted as Mean  $\pm$  SEM from 3 independent experiments. (B) Interaction between CNOT3 fragments and CNOT1 or CNOT2. HA-tagged CNOT3 fragments were expressed in *Cnot3* cKO ESCs and affinity purified by HA-beads. Co-purified endogenous CNOT1 and CNOT2 were detected by western blot. Cropped images of the same blots were shown in Figure 3D. (C) Representative images of alkaline phosphatase stained colonies from Figure 3G (white bar = 100  $\mu$ m).

**Figure S5. CNOT3 regulates differentiation gene mRNA expression and deadenylation.** (A) CNOT3 localization in ESCs. ESCs were treated with or without leptomycin B, and protein localization was determined by immunofluorescence staining. Localization of Cyclin B1 served as a positive control (white bar = 20  $\mu$ m). (B) Comparison of changes in polysome-associated vs. total RNAs between WT and *Cnot3* KO ESCs. *Cnot3* cKO ESCs were treated with (KO) or without 4-OHT (WT) for 72 hrs, and both total and polysome-associated RNAs were extracted and sequenced. Log<sub>2</sub> fold-changes were calculated for all detected total or polysome-associated RNAs in WT and KO cells and plotted. (C) Venn diagram comparing CNOT3 target genes in ESCs (194 genes) and MEFs (486 genes). p-value represents the test for depletion in overlapping genes, and was calculated by the Fisher Exact test. (D) Quantitation of global polyadenylation in WT and *Cnot3* KO ESCs. *Cnot3* cKO ESCs were treated with (KO) or without 4-OHT (WT) for 48 hrs, and global polyadenylation in total RNAs were determined by biotinylated Oligo-dT



hybridization. Relative hybridization signal intensity values were plotted as Mean  $\pm$  SEM from 3 independent experiments. **(E)** Standards used for poly(A)-tail length determination. Each poly(A) standard was synthesized by in vitro transcription followed by poly(A) tailing, and the length of the poly(A) tail was estimated by the size difference between the in vitro transcribed and the polyadenylated standard using bioanalyzer. The estimated poly(A)-tail length for the standards are: p(A)-SD1 = 0 A; p(A)-SD2 = 30 A; p(A)-SD3 = 100 A. **(F)** Measurements of poly(A)-tail length of pluripotency gene mRNAs based on the Oligo-dT fractionation method. Values were plotted as Mean  $\pm$  SEM from 3 independent experiments. **(G)** Examination of mRNA stability for the indicated genes. E14 ESCs were transfected with *Cnot1* or *Cnot2* siRNAs. Actinomycin-D was added to the cells 48 hrs after transfection, and mRNA level was measured by RT-qPCR at the indicated time points after Actinomycin-D treatment. Relative expression values were plotted as Mean  $\pm$  SEM from 3 independent experiments. **(H)** Overexpression of CNOT3 target genes in ESCs. E14 cells were transfected with plasmids expressing the indicated genes using Lipofectamine 2000. Cell morphology was imaged 72 hrs after transfection (white bar = 200  $\mu$ m).

## Supplemental Tables

**Table S1: Changes in mRNA half-life and steady-state level after *Cnot3* deletion (excel attached)**

**Table S2: Gene ontology analysis for up-regulated genes in *Cnot3* KO ESCs**

| GO term                                                    | p-value  | -LOG(p-value) |
|------------------------------------------------------------|----------|---------------|
| developmental process                                      | 8.58E-12 | 11.06662882   |
| multicellular organismal development                       | 2.07E-11 | 10.68417222   |
| system development                                         | 2.71E-10 | 9.566792523   |
| organ development                                          | 4.15E-10 | 9.381632278   |
| anatomical structure development                           | 1.04E-09 | 8.981101734   |
| cell differentiation                                       | 7.84E-09 | 8.105426255   |
| cellular developmental process                             | 2.06E-08 | 7.685927377   |
| Wnt receptor signaling pathway, calcium modulating pathway | 2.80E-08 | 7.553361502   |
| placenta development                                       | 8.41E-06 | 5.075135325   |
| anatomical structure morphogenesis                         | 9.44E-06 | 5.024928977   |
| embryonic placenta development                             | 2.59E-05 | 4.586413727   |
| heart development                                          | 3.12E-05 | 4.505344342   |
| embryonic organ development                                | 1.04E-04 | 3.981376088   |
| tissue development                                         | 1.55E-04 | 3.809826638   |
| anatomical structure formation involved in morphogenesis   | 1.56E-04 | 3.805510393   |
| vasculature development                                    | 1.81E-04 | 3.743337562   |
| angiogenesis                                               | 2.79E-04 | 3.55503242    |
| cell adhesion                                              | 2.93E-04 | 3.533834593   |
| biological adhesion                                        | 3.00E-04 | 3.522609248   |
| blood vessel development                                   | 3.31E-04 | 3.479932407   |
| cell development                                           | 4.46E-04 | 3.351019422   |
| organ morphogenesis                                        | 4.77E-04 | 3.321027603   |
| cellular amino acid derivative biosynthetic process        | 5.74E-04 | 3.241170939   |
| cellular process                                           | 6.69E-04 | 3.17483647    |
| negative regulation of cellular process                    | 7.12E-04 | 3.147793718   |

**Table S3: Gene expression datasets used for data analysis**

| Citation                  | PMID     | Accession | Gene (s)                                                                            |
|---------------------------|----------|-----------|-------------------------------------------------------------------------------------|
| Yamaji et al. (2013)      | 23333148 | GSE42580  | Prdm14 KO                                                                           |
| Oldfield et al. (2014)    | 25132174 | GSE56840  | NF-YA,B,C triple KD                                                                 |
| Cinghu et al. (2014)      | 24711389 | GSE47872  | Ncl KD                                                                              |
| Loh et al. (2006)         | 16518401 | GSE4189   | Oct4 KD                                                                             |
| Leeb et al. (2010)        | 20123906 | GSE19076  | Eed, Ring1B KO                                                                      |
| Shen et al. (2008)        | 19026780 | GSE12982  | Ezh2 KO                                                                             |
| Jiang et al. (2008)       | 18264089 | GSE9775   | Klf2,4,5 triple KD                                                                  |
| Ho et al. (2009)          | 19279218 | GSE14344  | Brg KO                                                                              |
| Ho et al. (2011)          | 21785422 | GSE27708  | LIF withdrawal (Stat3)                                                              |
| Freudenberg et al. (2012) | 22210859 | GSE34887  | Tet1 KD                                                                             |
| Ivanova et al. (2006)     | 16767105 | GSE4679   | Esrrb, Nanog, Sox2, Tbx3, Tcl1 KD                                                   |
| Merrill et al. (2011)     | 21685894 | GSE27455  | Tcf3 KO                                                                             |
| Ding et al. (2009)        | 19345177 | GSE12078  | Paf1 KD                                                                             |
| Lim et al. (2008)         | 18804426 | GSE12482  | Sall4 KD                                                                            |
| Yamamizu et al. (2011)    | 25371362 | GSE31381  | Gata2, Gata3, Dtx3, Eomes, T, Ascl2, Cdx2, Sox9, Ascl1, Rhox6, Foxa1, Sox7, Tbx5 OE |

**Table S4: Primers used in this study**

| <b>qPCR primers</b>                                                                         |                                                                          |                               |
|---------------------------------------------------------------------------------------------|--------------------------------------------------------------------------|-------------------------------|
| mCnot3                                                                                      | Cnot3-F                                                                  | AGAGGCCGATCTACAGATAGTGA       |
|                                                                                             | Cnot3-R                                                                  | GACAGGCTTGGAGCCATTT           |
| mHand1                                                                                      | Hand1-F                                                                  | TCTGGCTCGCTCTCTCGTCC          |
|                                                                                             | Hand1-R                                                                  | CTCGAGAAGGCATCAGGGTA          |
| mCited1a                                                                                    | Cited1a-F                                                                | TCGAGGCCTGCACTTGATGTCAAG      |
|                                                                                             | Cited1a-R                                                                | ATCCTTCACTCCAAGGTTGGAGTAG     |
| mSox9                                                                                       | Sox9-F                                                                   | ATCTGCACAACGCGGAGCTCA         |
|                                                                                             | Sox9-R                                                                   | CTCTTCTCGCTCTCGTTCAGCAG       |
| mFoxa1                                                                                      | Foxa1-F                                                                  | GAACTCCATCCGCCACTCGCTG        |
|                                                                                             | Foxa1-R                                                                  | GCGCAAGTAGCAGCCGTTCTCG        |
| mOct4                                                                                       | Oct4-F                                                                   | CCTCCTCTGAGCCCTGTGC           |
|                                                                                             | Oct4-R                                                                   | CTCCTTCTGCAGGGGCTTTCAT        |
| mSox2                                                                                       | Sox2-F                                                                   | TCGGGCTCCAAACTTCTCT           |
|                                                                                             | Sox2-R                                                                   | TGCTGCCTCTTTAAGACTAGGG        |
| mActin                                                                                      | Actin-F                                                                  | AAGGCCAACCGTGAAAAGAT          |
|                                                                                             | Actin-R                                                                  | GTGGTACGACCAGAGGCATAC         |
| mCdx2                                                                                       | Cdx2-F                                                                   | CCTGTGCGAGTGGATGCGGAAG        |
|                                                                                             | Cdx2-R                                                                   | CTCCAGCTCCAGCCGCTGA           |
| mActin2                                                                                     | Actin2-F                                                                 | AGTACTCTGTCTGGATCGGTGGCTC     |
|                                                                                             | Actin2-R                                                                 | TCGTTCGTATTCTGTTTGCTGATC      |
| mCnot3-N-term                                                                               | Cnot3-N-term-F                                                           | GAGGCTGACCTAAAGAAGGAGA        |
|                                                                                             | Cnot3-N-term-R                                                           | TCATTTGATGCTACCCATGTCT        |
| mCnot3-C-term                                                                               | Cnot3-C-term-F                                                           | GAGTTCTACCAGCGCCTGTC          |
|                                                                                             | Cnot3-C-term-R                                                           | AATCGCCAGGACTGCTTCT           |
| <b>Poly(A) standards (*Primers for cloning poly(A) standards also work as qPCR primers)</b> |                                                                          |                               |
| Hygro*                                                                                      | P(A)-SD1-F                                                               | GTATTGACTGGAGCGAGGCGAT        |
|                                                                                             | P(A)-SD1-R                                                               | CTGCTGCTCCATACAAGCCAACCA      |
| GFP*                                                                                        | P(A)-SD2-F                                                               | GAACGGCATCAAGGTGAACTTCAAGAT   |
|                                                                                             | P(A)-SD2-R                                                               | GTGTTTCGCTGGTAGTGGTTCGGCGA    |
| Luciferase*                                                                                 | P(A)-SD3-F                                                               | GTGCCAGAGTCCTTCGATAGGGACAA    |
|                                                                                             | P(A)-SD3-R                                                               | CGACACCTTTAGGCAGACCAGTAGATCCA |
| <b>Cloning primers for Cnot3</b>                                                            |                                                                          |                               |
| mCnot3 aa249 pDNR5                                                                          | GGGGACAAGTTTGTACAAAAAAGCAGGCTCCGCCACCATGGAGGACG<br>AGATCTTCAACCAGTC      |                               |
| mCnot3 aa605 pDNR5                                                                          | GGGGACAAGTTTGTACAAAAAAGCAGGCTCCGCCACCATGCTCACCAA<br>GGAGCAGCTATACCAACAGG |                               |
| mCnot3 aa636 pDNR3                                                                          | GGGGACCACTTTGTACAAGAAAGCTGGGTCCGGGAGGTACTGCCGAAT<br>GCG                  |                               |
| mCnot3 pDNR5                                                                                | GGGGACAAGTTTGTACAAAAAAGCAGGCTCCGCCACCATGGCGGACAA<br>GCGCAAACCTCC         |                               |
| mCnot3 pDNR3                                                                                | GGGGACCACTTTGTACAAGAAAGCTGGGTCCCTGGAGGTCCCGGTCCTC<br>CAGG                |                               |
